# Supplementary material
Source: publisher figshare collection journal article supplement (https://acs.figshare.com/ndownloader/files/4393174)
Supplement: Supplementary file 1 [file 4393174]

# Understanding Growth Morphology Changes of $\gamma$ -Glycine and DL-alanine Polar Crystals in Pure Aqueous Solutions

*Guangjun Han<sup>a,\*</sup>, Sendhil K. Poornachary<sup>a</sup>, Pui Shan Chow<sup>a</sup>, Reginald B. H. Tan<sup>a,b,\*</sup>*

<sup>a</sup> Institute of Chemical and Engineering Sciences, A-STAR (Agency for Science, Technology and Research), 1, Pesek Road, Jurong Island, Singapore 627833

<sup>b</sup> Department of Chemical and Biomolecular Engineering, National University of Singapore, 10 Kent Ridge Crescent, Singapore 119260

\* Corresponding author. Tel: +65 6796-3879. Fax: +65 6316-6183.

E-mail: [han\\_guangjun@ices.a-star.edu.sg](mailto:han_guangjun@ices.a-star.edu.sg); [reginald\\_tan@ices.a-star.edu.sg](mailto:reginald_tan@ices.a-star.edu.sg)

TITLE RUNNING HEAD: Unexpected Changes in Growth Morphology of Polar Crystals

**Supporting Information** (Manuscript ID: cg-2010-00934f) – Using PXRD and Raman spectrometry to determine the polymorphic purity of  $\gamma$ -glycine and  $\alpha$ -glycine

We have obtained the PXRD patterns of the glycine seed crystals we made and we have reported them in Figure 1 (for  $\gamma$ -glycine) and Figure 2 (for  $\alpha$ -glycine). Given that the PXRD patterns of our glycine samples are in very good agreement with the simulated diffraction patterns<sup>1</sup> and the reference PXRD

patterns<sup>1</sup> of  $\gamma$ -glycine (cf. Figure 1) and  $\alpha$ -glycine (cf. Figure 2) respectively, we confirm that our glycine samples were a powder of either pure  $\gamma$ -glycine or pure  $\alpha$ -glycine, not a mixture of polymorphs. These pure  $\gamma$ -glycine and  $\alpha$ -glycine powders were then used to establish the distinct Raman spectra (cf. Figure 3) of  $\gamma$ -glycine and  $\alpha$ -glycine respectively for distinguishing and identifying the polymorphic form of a single glycine seed crystal<sup>2,3</sup> prior to its growth in a solution.

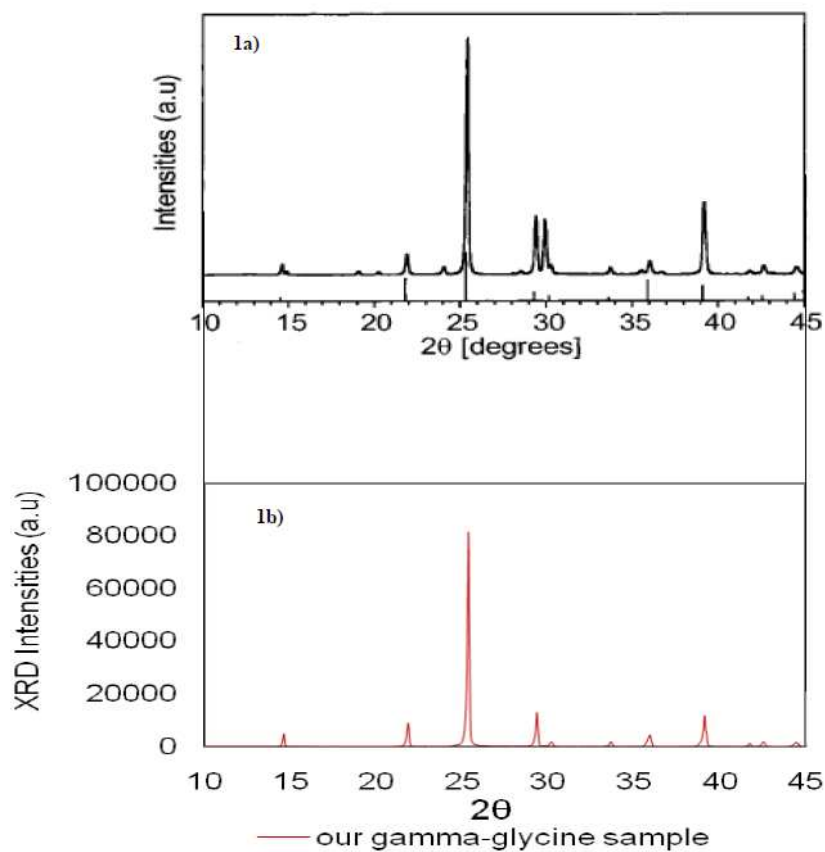

Figure 1. 1a) Simulated diffraction pattern (represented by sticks) and reference PXRD pattern of a pure  $\gamma$ -glycine sample (Cryst. Growth Des. **2001**, 1, 5–8); 1b) PXRD pattern of our  $\gamma$ -glycine sample.

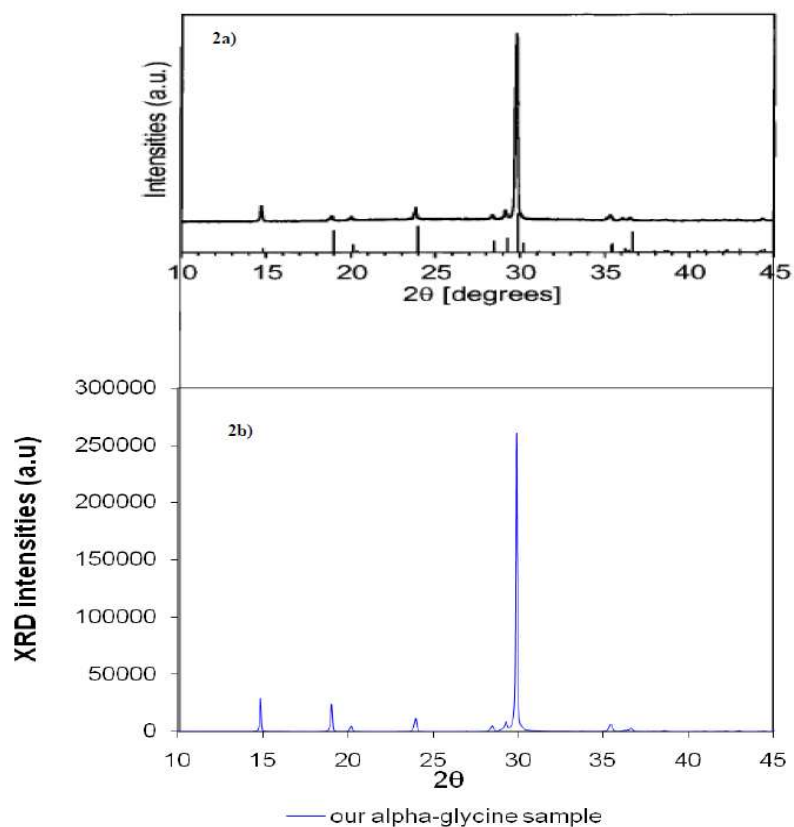

Figure 2. 2a) Simulated diffraction pattern (represented by sticks) and reference PXRD pattern of a pure  $\alpha$ -glycine sample (Cryst. Growth Des. **2001**, 1, 5–8); 2b) PXRD pattern of our  $\alpha$ -glycine sample.

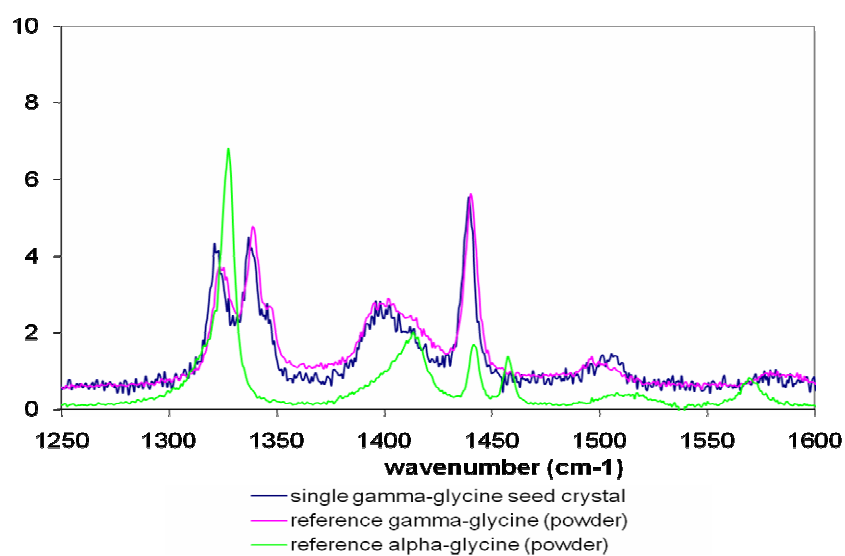

Figure 3. Raman spectra of reference  $\alpha$ - and  $\gamma$ -glycine (powder) and a single  $\gamma$ -glycine seed crystal.

## REFERENCES

1. Zaccaro, J.; Matic, J.; Myerson, A. S.; Garetz, B. A. Cryst. Growth Des. **2001**, 1, 5–8.
2. Lee, A. Y.; Lee, I. S.; Myerson, A. S. Chem. Eng. Technol. **2006**, 29, 281–285.
3. Lee, I. S.; Kim, K. T.; Lee, A. Y.; Myerson, A. S. Cryst. Growth Des. **2008**, 8, 108–113.
